1  
2  
3  
4  
5  
6  
7  
8  
9  
10  
11  
12  
13  
14  
15  
16  
17  
18  
19  
20  
21  
22  
23

**Bacteria-mediated stabilization of a panel of Picornaviruses**

Elizabeth R. Aguilera<sup>1</sup>, Y Nguyen<sup>1</sup>, Jun Sasaki<sup>2</sup>, Julie K. Pfeiffer<sup>1\*</sup>

<sup>1</sup>Department of Microbiology, University of Texas Southwestern Medical Center, Dallas, Texas, USA

<sup>2</sup>Department of Virology and Parasitology, Fujita Health University School of Medicine, Toyoake, Aichi 470-1192, Japan

Short Title: Effects of bacteria on Picornaviruses

Keywords: Bacteria, Picornaviruses, Stability

Abstract word count: 206

Text word count: 4,390

\*Corresponding Author: Julie K. Pfeiffer

Julie.Pfeiffer@UTSouthwestern.edu

Phone: (214) 648-8775

24 **ABSTRACT**

25         Several viruses encounter various bacterial species within the host and in the  
26 environment. Despite these close encounters, the effects of bacteria on picornaviruses  
27 specifically is not completely understood. Previous work determined that poliovirus (PV),  
28 an enteric virus, has enhanced virion stability when exposed to bacteria or bacterial  
29 surface polysaccharides such as lipopolysaccharide. Virion stabilization by bacteria may  
30 be important for inter-host transmission since a mutant PV with reduced bacterial  
31 binding had a fecal-oral transmission defect in mice. Therefore, we investigated whether  
32 bacteria broadly enhance stability of picornaviruses from three different genera:  
33 *Enterovirus* (PV and coxsackievirus B3 (CVB3)), *Kobuvirus* (Aichi virus) and *Cardiovirus*  
34 (Mengo virus). Furthermore, to delineate strain-specific effects, we examined two  
35 strains of CVB3 and a PV mutant with enhanced thermal stability. We determined that  
36 specific bacterial strains enhance thermal stability of PV and CVB3, while Mengo virus  
37 and Aichi virus are stable at high temperatures in the absence of bacteria. Additionally,  
38 we determined that bacteria or lipopolysaccharide can stabilize PV, CVB3, Aichi virus,  
39 and Mengo virus during exposure to bleach. These effects are likely mediated through  
40 direct interactions with bacteria since viruses bound to bacteria in a pull-down assay.  
41 Overall, this work reveals shared and distinct effects of bacteria on a panel of  
42 picornaviruses.

43

44 **IMPORTANCE**

45         Recent studies have shown that bacteria promote infection and stabilization of  
46 poliovirus particles, but the breadth of these effects on other members of the

47 *Picornaviridae* family is unknown. Here, we compared the effect of bacteria on four  
48 distinct members of the *Picornaviridae* family. We found that bacteria reduced  
49 inactivation of all of the viruses during bleach treatment, but not all viral strains were  
50 stabilized by bacteria during heat treatment. Overall, our data provide insight into how  
51 bacteria play differential roles on picornavirus stability.

52

## 53 **INTRODUCTION**

54 The *Picornaviridae* family includes important human pathogens that can cause a  
55 range of diseases such as the common cold, meningitis, hepatitis, and paralysis. The  
56 *Picornaviridae* family is diverse and currently includes 80 species in 35 genera.  
57 Members of this family are nonenveloped and contain a single-stranded, positive-sense  
58 viral genome approximately 7,500 nucleotides in length (1).

59 Recent studies have shown that bacteria, in particular the gut microbiota, play  
60 several important roles during viral infection. Enteric viruses encounter a milieu of  
61 microorganisms, including bacteria, both within and outside of the host. It is estimated  
62 that these viruses encounter approximately  $10^{11}$  bacteria in the host and are expected  
63 to encounter even more in the environment (2). Indeed, bacteria enhance infection of  
64 several unrelated viruses, including poliovirus, reovirus, rotavirus, mouse mammary  
65 tumor virus, and norovirus (3-9). These “pro-viral” effects are mediated by two known  
66 mechanisms: 1) Direct interactions between bacteria and viruses that increased virion  
67 stability and attachment to host cells, and 2) indirect interactions between bacteria and  
68 the host immune system that modulated immune responses for productive viral infection  
69 (3-8,10).

70 Intriguingly, bacteria and bacterial molecules can inhibit infection with certain  
71 viruses. For example, Ichinohe *et al.* demonstrated that certain bacteria promote host  
72 immune responses during influenza infection of mice (11). More recently, Bandoro *et al.*  
73 determined that exposure to the bacterial surface molecule lipopolysaccharide (LPS)  
74 reduced stability of several strains of influenza virus by altering the morphology of the  
75 virion envelope (12).

76 Based on the importance of bacterial-viral interactions on viral infection, we  
77 sought to determine whether bacteria differentially affect different members of the same  
78 viral family, the *Picornaviridae*. We used a panel of four picornaviruses that are spread  
79 by the fecal-oral route and represent three separate genera: *Enterovirus* (coxsackievirus  
80 B3 (CVB3) and PV), *Kobuvirus* (Aichi virus) and *Cardiovirus* (Mengo virus). We found  
81 that a subset of the viral panel were stabilized by bacteria during heat treatment but that  
82 all of the picornaviruses tested were stabilized by bacteria during bleach treatment. We  
83 also determined that viruses bound to bacteria, indicating that direct interactions may be  
84 facilitating viral stabilization of these viruses. This work expands on bacteria-mediated  
85 enhancement effects previously observed with PV to other members of the  
86 *Picornaviridae* family. Ultimately, this work defines the unique interactions between  
87 specific viruses and bacteria which may provide insight into virion environmental  
88 stability and transmission.

89

## 90 **RESULTS**

91 **Panel of viruses from the *Picornaviridae* family and bacterial strains.** Previous  
92 studies have indicated that bacteria can reduce the inactivation of poliovirus particles

93 after heat or bleach treatment (3,7). In order to investigate whether bacteria stabilize  
94 other members of the *Picornaviridae* family from these inactivating conditions, we  
95 selected viruses from separate genera and viruses with differences in capsid sequence  
96 similarity (**Fig. 1 A, B and Table 1**). These viruses differ in their capsid structure  
97 sequence and topology, which may confer different interactions with bacteria (**Fig. 1A**).  
98 The panel is composed of one virus from the *Kobuvirus* genus (Aichi virus), one virus  
99 from the *Cardiovirus* genus (Mengo virus) and three viruses from the Enterovirus genus  
100 (PV, CVB3-H3 and CVB3-Nancy). CVB3-Nancy and CVB3-H3 have 98.4% capsid  
101 sequence similarity at the amino acid level and were compared to determine whether  
102 there are strain-specific differences in bacteria-mediated stabilization (**Fig. 1B and**  
103 **Table 1**). Additionally, our panel included a PV mutant with a single amino acid change  
104 in the VP1 capsid coding region (PV-M132V), that confers enhanced thermal stability in  
105 the absence of bacteria (13).

106 We also selected a representative panel of enteric bacteria, and bacterial and  
107 non-bacterial molecules (**Table 2**). We included LPS, which is glycan found on the  
108 surface of Gram negative bacteria. Additionally, we examined two representative Gram  
109 negative bacterial strains (*Escherichia coli* 1470 and *Prevotella ruminicola*), and two  
110 representative Gram positive bacterial strains (*Bacillus badius* and *Lactobacillus*  
111 *johnsonii*). We previously showed that *E. coli* 1470, *P. ruminicola*, *B. badius* and *L.*  
112 *johnsonii* bind to PV (14), but whether these strains stabilize PV and other  
113 picornaviruses was unknown. We also previously showed that non-bacterial  
114 compounds, such as bovine albumin serum (BSA) and cellulose, had minimal effects on  
115 PV stability and were included in this study as controls (**Table 2**) (3,7).

116

117 **Specific bacteria enhance stability of a subset of picornaviruses during heat**  
118 **treatment.** To determine whether bacteria enhance stability of picornaviruses, we first  
119 examined viral inactivation at elevated temperatures. Picornavirus particles can be  
120 inactivated by undergoing premature genome release at a range of temperatures, with  
121 faster inactivation at higher temperatures (7,15,16). To increase tractability of our  
122 assays, we used relatively high temperatures for our thermal inactivation experiments  
123 because inactivation occurs relatively quickly. We first tested viral stability at 44°C for  
124 4.5 h, a condition that we determined inactivates approximately 99% of PV infectivity  
125 during incubation in PBS (**Fig. 2A**). Viruses were mixed with PBS, compounds (BSA,  
126 Cellulose or LPS), or bacteria, incubated at 44°C for 4.5 h, and plaque assays were  
127 performed to quantify the amount of viable virus remaining. When we incubated PV with  
128 any of the bacterial strains or LPS, we observed >50-fold increase in viral stability  
129 compared to PBS (**Fig. 2A**). A similar stabilization was observed for CVB3-H3 and  
130 CVB3-Nancy when compared to PBS. Non-bacterial compounds (BSA and Cellulose)  
131 did not stabilize PV or either CVB3 strain. Interestingly, Aichi virus and Mengo virus  
132 were very stable in PBS under these conditions. We also tested a recently identified  
133 heat-resistant PV mutant, PV-M132V (13). Like Aichi virus and Mengo virus, PV-M132V  
134 was resistant to heat treatment, and thus incubation with any of the compounds or  
135 bacterial strains did not increase stability (**Fig. 2A**).

136 We next wanted to determine whether bacteria could increase stability of the  
137 heat-stable viruses at temperatures where they become heat labile. First, we increased  
138 the temperature in the thermal stability assay to 46°C, and found that similar to the 44°C

139 assay, PV, CVB3-H3, and CVB3-Nancy were stabilized by bacteria (**Fig. 2B**). Aichi  
140 virus, Mengo virus, and PV-M132V were still stable in the 46°C assay and incubation  
141 with any of the bacteria compounds or strains did not increase stability. To determine  
142 the temperature necessary to inactivate Aichi virus and Mengo virus, we tested viability  
143 at temperatures from 46-58°C for 4.5 h. These additional experiments at different  
144 temperatures revealed that Aichi virus and Mengo virus were ~99% inactivated when  
145 incubated at 50°C or 57°C for 4.5 h, respectively (**Fig. 2C-2F**). Despite viral inactivation  
146 during these conditions, none of the bacterial strains or bacterial polysaccharides could  
147 stabilize either of these viruses (**Fig. 2D and 2F**). Intriguingly, BSA stabilized Aichi virus  
148 during incubation at 50°C, indicating this virus may have different requirements for  
149 stabilization during heat treatment (**Fig. 2D**). Overall, these data indicate that bacteria  
150 do not stabilize Aichi and Mengo virus during incubation at high temperatures, but that  
151 bacterial stabilization of these viruses may be less important given their inherent high  
152 stability.

153

154 **The effect of feces on picornaviruses.** We next wanted to determine whether the  
155 viruses in our panel are stabilized in feces. As enteric viruses are transmitted by the  
156 fecal-oral route, the potential effects of fecal components on their stability and infection  
157 is highly relevant. We previously showed that PV is stabilized in feces from conventional  
158 mice (7). Here, we compared viral stability when viruses were incubated in PBS or feces  
159 from conventional mice over the course of several days at 37°C followed by  
160 quantification of remaining viable virus by plaque assay. We found that Aichi virus was  
161 not stabilized by feces compared to PBS at 37°C after Day 1 (**Fig. 3A**). Feces only

162 moderately stabilized CVB3-H3 at early timepoints (**Fig. 3B**). However, CVB3-Nancy  
163 and PV were stabilized by feces at later timepoints (see Day 8) (**Fig. 3C and 3E**). We  
164 also demonstrated that PV-M132V was stable during 8 days of incubation at 37°C in  
165 both PBS and feces (13). Interestingly, Mengo virus exhibited significant inactivation  
166 after 4 days at 37°C, but incubation in feces limited this inactivation (**Fig. 3D**). This  
167 result was surprising given the stability of Mengo virus at 46°C for 4.5 h and the lack of  
168 bacterial stabilization of Mengo virus at 57°C (**Fig. 2B and 2F**). However, Mengo virus  
169 may have enhanced thermal sensitivity over longer time courses and bacterial effects  
170 may be apparent only under these conditions and/or non-bacterial components of feces  
171 could affect Mengo virus. When we incubated Mengo virus with mixtures of *E. coli*, *P.*  
172 *ruminicola*, and *L. johnsonii* at 37°C for several days, Mengo virus was stabilized  
173 compared to PBS at 37°C (see dashed line compared to dotted line) (**Fig. 3F**). These  
174 findings indicate that bacteria stabilize Mengo virus during longer exposures to body  
175 temperature (37°C) (**Fig. 3F**). Overall, these data indicate that several picornaviruses,  
176 but not all, are stabilized in feces, which could facilitate transmission.

177

178 **Bacteria enhance stability of picornaviruses during bleach exposure.** In addition to  
179 heat, virions can be inactivated by chlorine bleach via capsid penetration and damage  
180 and/or genome release (17-21). To determine whether bacteria affect bleach  
181 inactivation of viruses, we pre-incubated viruses in PBS, compounds, or bacterial  
182 strains for 1 h followed by exposure to dilute bleach (0.0001%) for 1 min, neutralization,  
183 and plaque assay to determine the amount of viable virus present. We determined that  
184 when pre-incubated in PBS, all viruses lost ~90% of their infectivity (**Fig. 4**). However,



185 when pre-incubated with LPS or bacterial strains, all viruses were stabilized by at least  
186 some of the treatments (**Fig. 4**). Importantly, pre-incubation of the viruses with BSA or  
187 cellulose did not prevent viral inactivation by bleach treatment, indicating that the effects  
188 were specific to bacteria and LPS and not just due the presence of additional molecules  
189 (**Fig. 4**). Interestingly, the heat stable PV-M132V mutant virus was inactivated by bleach  
190 to the same extent as PV-WT, and bacteria limited bleach inactivation of PV-M132V.  
191 These results suggest that thermal inactivation and bleach inactivation occur through  
192 separable mechanisms, and that bacteria stabilize virions for both. Overall, these results  
193 indicate that bacteria enhance viral stability of fecal-orally transmitted picornaviruses  
194 during bleach treatment.

195

196 **Bacteria bind to a select panel of picornaviruses.** Since bacteria enhanced stability  
197 of specific picornaviruses during heat or bleach inactivation, we wanted to determine  
198 whether viruses directly interact with bacteria. In particular, we were curious whether  
199 bacterial binding efficiencies vary among closely related viruses, such as CVB3-Nancy  
200 and CVB3-H3, or between the PV-M132V heat stable mutant and PV-WT. Previously,  
201 we showed that PV can bind directly to the surface of bacteria (3,7,14). <sup>35</sup>S-labeled  
202 CVB3-Nancy, CVB3-H3, PV-WT, or PV-M132V were incubated with beads, *B.adius*,  
203 or *E. coli* for 1 h followed by centrifugation, washing, and scintillation counting the  
204 bacterial pellets to quantify viral binding. We determined that PV-WT and PV-M132V  
205 bound to both bacterial strains to approximately the same extent (**Fig. 5A**). This  
206 indicates that while the PV-M132V mutant does not require the presence of bacteria for  
207 stability during heat treatment, it still binds to bacteria, which could explain why bacteria

208 limit bleach inactivation of PV-M132V (**Fig. 4**). Additionally, we determined that both  
209 CVB3 strains bind to the two bacterial strains tested (**Fig. 5B**). Interestingly, binding of  
210 CVB3-Nancy to *E. coli* was nearly 3-fold higher than CVB3-H3 (**Fig. 5B**). Overall, these  
211 results indicate that multiple picornaviruses bind to bacteria, but with different  
212 efficiencies.

213

## 214 **DISCUSSION**

215 The *Picornaviridae* family is diverse and includes a large number of medically  
216 relevant human pathogens. While it has been shown that bacteria promote infection, co-  
217 infection, and transmission of poliovirus, the impact of bacteria on other picornaviruses  
218 is unclear (3,7,14). Here, we show that bacteria increase stability of several viruses from  
219 the *Picornaviridae* family, likely through direct interactions.

220 Our data show that bacteria-mediated thermal stability can vary among a family  
221 of viruses. We determined that certain picornaviruses (*Enterovirus* genus members:  
222 CVB3-H3, CVB3-Nancy and PV) are sensitive to heat treatment and that bacteria  
223 increase stability of these viruses (**Fig. 2 and Fig. 3**). We also determined that another  
224 picornavirus (*Cardiovirus* genus: Mengo virus) has mixed phenotypes depending on the  
225 condition tested. While Mengo virus was very stable at high temperatures during  
226 relatively short incubation times (4.5 h) and was not impacted by bacteria under these  
227 conditions, it was inactivated after 4 days at 37°C and exposure to feces reduced this  
228 inactivation (**Fig. 3D**). This suggests that Mengo virus may be stabilized by bacteria at  
229 physiological temperatures in the host. Finally, we determined that a distantly related  
230 picornavirus (*Kobuvirus* genus: Aichi virus) is relatively resistant to high temperature,

231 but is not stabilized by bacteria or bacterial products (**Fig. 2 and Fig. 3A**). In fact,  
232 exposure to feces slightly reduced Aichi virus infectivity (**Fig. 3A**). Although Aichi virus is  
233 transmitted by the fecal-oral route, there are large sequence and structural differences  
234 between Aichi and other picornaviruses that may contribute to the different phenotype  
235 (**Fig. 1 A and B**) (22,23). Although a member of the *Caliciviridae*, human norovirus can  
236 bind to and is stabilized by bacteria that express certain histo-blood group antigens  
237 (24,25). Similarly, reovirus (*Reoviridae* family) can be stabilized by exposure to certain  
238 bacteria or bacterial surface molecules, but stabilization efficiency and specificity varies  
239 among different reovirus strains (8). Taken together, these results indicate that viruses  
240 from separate viral families can be stabilized by bacteria, but that not all viruses within a  
241 given family share phenotypes.

242 While picornaviruses vary in bacteria-mediated thermal stabilization, we found  
243 that bacteria enhanced viability of all picornaviruses tested during bleach treatment  
244 (**Fig. 4**). Although the PV-M132V mutant was not inactivated at high temperatures, it  
245 was inactivated by bleach treatment and bacteria limited this inactivation. Indeed, the  
246 PV-M132V virus was determined to bind to bacteria, which could explain stabilization  
247 during bleach treatment (**Fig. 4**). Thus, heat inactivation and bleach inactivation are  
248 independent and could have separate requirements for stabilization.

249 Overall, this study provides insight into the effects of bacteria on a panel of  
250 viruses from the same family, the *Picornaviridae*. Understanding the role of bacteria  
251 during stabilization and infection of viruses could provide insight into efficient infection  
252 within specific hosts (i.e. harboring specific microbiota) as well as between hosts (i.e.  
253 environmental bacteria).

254

## 255 **MATERIALS AND METHODS**

256 **Cells and viruses.** HeLa cells were propagated in Dulbecco's modified Eagle's medium  
257 (DMEM) supplemented with 10 % calf serum and 1 % penicillin/streptomycin. HeLa  
258 cells were used for CVB3, Mengo virus, and PV propagation and quantification of viral  
259 titer by plaque assay (26-28). Vero cells were propagated in DMEM supplemented with  
260 10% fetal bovine serum (FBS) and 1 % penicillin/streptomycin. Vero cells were used for  
261 Aichi virus propagation and quantification of viral titer by plaque assay. All infections  
262 were performed using viruses derived from infectious cDNA clones (the Mengo virus  
263 clone was a kind gift from Marco Vignuzzi) (29,30). All viruses were confirmed by  
264 Sanger sequencing.

265 To quantify virus, plaque assay was performed as previously described  
266 (26,27,30) Briefly, virus was diluted in phosphate-buffered saline supplemented with  
267 100 µg/mL CaCl<sub>2</sub> and 100 µg/mL MgCl<sub>2</sub> (PBS+) and added to cells for 30 min at 37°C in  
268 presence of 5 % CO<sub>2</sub> to allow for attachment. Agar overlay containing DMEM,  
269 supplemented with 20 % calf serum, and 2 % agar was used for CVB3 and PV samples  
270 and removed after 48 h. Agar overlay containing DMEM, supplemented with 20 % FBS,  
271 and 2 % agar was used for Aichi virus samples and removed after 48 h. Agar overlay  
272 containing P5 buffer and 2 % agar was used for Mengo virus samples and removed  
273 after 48 h (27).

274 Radiolabeling of picornaviruses was performed as previously described (3,7,28) .  
275 Briefly, viruses were propagated in the presence of <sup>35</sup>S-Cysteine/Methionine and were  
276 purified using cesium chloride gradients. Purity of viruses were confirmed by

277 phosphorimaging of radiolabeled capsid proteins on SDS-PAGE, and scintillation count  
278 to determine CPM and viable fractions (3).

279

280 **Bacterial strains.** Strains of bacteria were from ATCC or from the cecum of mice, as  
281 previously described (14). Cultures were inoculated from glycerol stocks in strain-  
282 specific nutrient media as previously described (14). Briefly, cultures were grown  
283 overnight, bacterial cell pellets were collected and washed in PBS+. After resuspension  
284 in 1 mL PBS+, OD<sub>600</sub> values were obtained by spectrophotometer (Eppendorf  
285 BioPhotometer D30) to determine colony forming units (CFUs) needed specific for each  
286 assay. Bacteria were UV inactivated prior to use in assays. The amount of bacteria was  
287 confirmed by plating on nutrient-specific agar and conditions prior to UV inactivation  
288 (14).

289

290 **Quantifying picornavirus binding to bacterial cells.** Bacterial binding assay was  
291 performed as previously described for poliovirus (14). Briefly, approximately 3,000 CPM  
292 (approximately  $1 \times 10^6$  PFU) of <sup>35</sup>S-radiolabeled virus was mixed with PBS+ or  $1 \times 10^8$   
293 CFU of bacteria and incubated at 37°C in presence of CO<sub>2</sub> for 1 h. After incubation,  
294 bacteria was pelleted and washed with PBS+ to remove unbound virus. The amount of  
295 CPM (virus bound to bacterial cells) was determined by scintillation counting.

296

297 **Quantifying effects of bacteria on virion stability.** To determine the effect of bacteria  
298 on thermal stability of picornaviruses,  $1 \times 10^5$  PFU of each virus was mixed with PBS+,  
299 1 mg/mL of bacterial surface polysaccharides, or  $1 \times 10^{10}$  CFU of bacteria and

300 incubated at 44°C for 4.5 h. The same procedure was followed for elevated temperature  
301 assays. After incubation, plaque assays were performed using virus-specific conditions  
302 to determine the amount of viable virus before and after heat treatment.

303 Bleach inactivation assay was performed as previously described for PV, except  
304 that a lower concentration of bleach was used here (7). Briefly,  $1 \times 10^5$  PFU of each  
305 virus was mixed with PBS+, 1 mg/mL of bacterial surface polysaccharides, or  $1 \times 10^8$   
306 CFU of bacteria. Samples were incubated at 37°C for 1 h and then added to 0.0001 %  
307 fresh bleach for 1 min. Bleach neutralization was done by adding 0.01 % sodium  
308 thiosulfate (Sigma). Plaque assays using virus-specific conditions were performed to  
309 determine amount of viable virus before and after bleach treatment.

310 To examine effects of feces on viral stability, feces from four- to ten-week-old  
311 male C57BL/6 *PVR-IFNAR* <sup>-/-</sup> mice were collected and resuspended in PBS+ to a final  
312 concentration of 0.0642 mg/ $\mu$ L. Briefly,  $1 \times 10^5$  PFU of virus was mixed with 300  $\mu$ L of  
313 PBS+ or resuspended fecal samples and incubated at 37°C in the presence of 5 %  
314 CO<sub>2</sub>. Additional samples in PBS+ were placed at 4°C as a control. Samples were taken  
315 at designated time points and processed by chloroform extraction as previously  
316 described (3,7). Plaque assay was performed to determine amount of viable virus  
317 before and at designated time points, as described earlier. In Figure 3F,  $1 \times 10^5$  PFU of  
318 Mengo virus was mixed with approximately  $1 \times 10^5$  CFU each of *E. coli*, *P. ruminicola*,  
319 and *L. johnsonii* in a total volume of 300  $\mu$ L and samples were incubated at 37°C.  
320 Samples were collected and titers were determined as described above.

321

322 **Mouse Experiments.** Animals were handled according to the Guide for the Care and  
323 Use of Laboratory Animals. C57BL/6 *PVR-IFNAR* <sup>-/-</sup> mice were obtained from S. Koike  
324 (Tokyo, Japan) (31). Feces collection was performed at UT Southwestern Medical  
325 Center.

326

327 **Data Analysis.** Figures of viral structures were generated using the UCSF Chimera  
328 software (<http://www.rbvi.ucsf.edu/chimera>). The Electron Microscopy Data Bank  
329 (EMDB) IDs used for each virus are as follows: Aichi virus (EM-9517), CVB3 (EM-6637)  
330 and Saffold virus (EM-3097) to represent their respective genera. The phylogenetic tree  
331 was generated using the MEGA7 software and following the Neighbor-Joining Method  
332 (32). The optimal tree with the sum of branch length = 2.65090397 is shown. The tree is  
333 drawn to scale, with branch lengths in the same units as those of the evolutionary  
334 distances used to infer the phylogenetic tree. The evolutionary distances were  
335 computed using the Poisson correction method and are in the units of the number of  
336 amino acid substitutions per site. (32). The analysis involved 5 amino acid sequences.  
337 All positions containing gaps and missing data were eliminated. There were a total of  
338 766 positions in the final phylogeny tree dataset.

339 All statistical analyses were performed using the GraphPad Prism Software.  
340 Outliers were identified and removed by the ROUT method, Q = 1%. All one way  
341 ANOVA tests were performed with Dunnett's multiple comparisons post hoc test. All  
342 two-way ANOVA tests were performed with Tukey's post hoc test.

343

344 **ACKNOWLEDGEMENTS**

345 We thank Andrea Erickson, Broc McCune and Arielle Woznica for critical review of the  
346 manuscript. We thank Marco Vignuzzi for the Mengo virus infectious clone. We also  
347 thank Mikal Woods-Acevedo for providing <sup>35</sup>S-labeled CVB3-H3 and CVB3-Nancy  
348 viruses. We also thank Nam Nguyen for assistance with structural modeling. Molecular  
349 graphics and analyses were performed with the UCSF Chimera package. Chimera is  
350 developed by the Resource for Biocomputing, Visualization, and Informatics at the  
351 University of California, San Francisco (supported by NIGMS P41-GM103311).

352

### 353 **FUNDING INFORMATION**

354 Work in J.K.P.'s lab is funded through NIH NIAID grant R01 AI74668, a Burroughs  
355 Wellcome Fund Investigators in the Pathogenesis of Infectious Diseases Award, and a  
356 Faculty Scholar grant from the Howard Hughes Medical Institute. E.R.A. was supported  
357 in part by the National Science Foundation Graduate Research Fellowship grant  
358 2014176649.

359

### 360 **FIGURE LEGENDS**

#### 361 **Figure 1. Panel of picornaviruses used in this study.**

362 **A)** Structural models of picornaviruses. Structural comparisons were performed using  
363 EMDB ascension numbers for each viral genus and topological distances from the  
364 center of the virion calculated from 135 Å (blue) to 155 Å (red), as indicated by the scale  
365 bar (22). Representative viruses for each genus are Aichi virus (*Kobuvirus*), CVB3  
366 (*Enterovirus*), and Saffold virus (*Cardiovirus*). The Aichi virus structure is at 3.7 Å  
367 resolution, CVB3 structure is at 3.9 Å resolution and Saffold virus is at 10.6 Å resolution.



368 Models and distances were generated with UCSF Chimera software. **B)** Phylogenetic  
369 tree of picornaviruses based on the amino acid sequence of the capsid-coding region.  
370 The tree was generated using MEGA7 software. The evolutionary history was inferred  
371 using the Neighbor-Joining method. The scale bar represents the number of  
372 substitutions per site.

373

374 **Figure 2. Effects of bacteria and compounds on picornavirus stability at elevated**  
375 **temperatures.** Thermal stability assays were performed by incubating  $1 \times 10^5$  PFU  
376 viruses in PBS, 1 mg/mL BSA, cellulose, LPS, or  $1 \times 10^{10}$  CFU of bacterial strains at  
377 various temperatures for 4.5 h. The amount of viable virus following each assay was  
378 determined by plaque assay and compared to PBS viral titer at 0 h to determine percent  
379 of input PFU. **A)** 44°C assay. Data are representative of ten to eighteen independent  
380 experiments, n= 4-47. **B)** 46°C assay. Data are representative of nine to fourteen  
381 independent experiments, n= 4-25. **C)** Incubation of Aichi virus in PBS at various  
382 temperatures. Data are representative of two to three independent experiments, n=3-5.  
383 **D)** Incubation of Mengo virus in PBS at various temperatures. Data are representative  
384 of one to three independent experiments, n=2-6. **E)** Aichi virus 50°C assay. Data are  
385 representative of two independent experiments, n=4. **F)** Mengo virus 57°C assay. Data  
386 are representative of two experiments, n=4. Bars are shown in SEM. Statistical  
387 significance was determined by one-way ANOVA, \* =  $P < 0.05$ . n.s., not significant.

388

389 **Figure 3. Picornavirus stability in feces.**  $1 \times 10^5$  PFU of A) Aichi virus, B) CVB3-H3,  
390 C) CVB3-Nancy, D) Mengo virus, or E) PV was incubated with PBS or a slurry of feces

391 from mice and incubated at 37°C (PBS, dashed lines; Feces, dotted lines) or 4°C (PBS,  
392 solid lines). Data are representative of two to three experiments,  $n = 4-5$ . In F)  $1 \times 10^5$   
393 PFU of Mengo virus was incubated with PBS or a mixture of *E. coli*, *P. ruminicola*, and  
394 *L. johnsonii* and incubated at 37°C (PBS, dashed lines; Bacteria, dotted lines) or 4°C  
395 (PBS, solid lines). Data are representative of two independent experiments,  $n = 4$ .  
396 Samples were taken at designated time points and processed prior to plaque assay for  
397 quantification of viable virus. Bars are shown in SEM. Statistical significance between  
398 PBS and feces or bacteria at 37°C was determined by two-way ANOVA,  $* = P < 0.05$ .

399

400 **Figure 4. Effects of bacteria on picornavirus stability during bleach treatment.**  $1 \times$   
401  $10^5$  PFU viruses were incubated individually in PBS, 1 mg/mL BSA, cellulose, LPS, or 1  
402  $\times 10^8$  CFU of bacterial strains at 37°C for 1 h. After incubation, samples were treated  
403 with 0.0001% bleach for 1 minute and neutralized with sodium thiosulfate. Amount of  
404 viable virus was determined by plaque assay and compared to PBS viral titer at 0 h to  
405 determine % of input PFU. Data are representative of seven to twenty independent  
406 experiments,  $n = 4-40$ . Bars are shown in SEM. Statistical significance was determined  
407 by one-way ANOVA,  $* = P < 0.05$ . n.s., not significant.

408 **Figure 5. Picornaviruses bind to bacteria.**  $^{35}\text{S}$ -labeled viruses (3,000  
409 CPM/approximately  $1 \times 10^6$  PFU) were incubated with  $1 \times 10^8$  CFU of bacteria for 1 h at  
410 37°C. After incubation, samples were spun down and washed to remove unbound virus.  
411 Bound virus was quantified by scintillation counting. Data are representative of two  
412 independent experiments,  $n=3-4$ . Bars are shown in SEM.  $* = P < 0.05$ , based on  
413 student's T test.

414

415

416

417

418

419

420

421

422 **Table 1. Percent sequence identity between panel of picornaviruses**

| <b>Capsid Amino Acid Sequence Similarity (%)</b> |              |             |             |         |            |            |
|--------------------------------------------------|--------------|-------------|-------------|---------|------------|------------|
| <b>Family and genus</b>                          | <b>Virus</b> | Aichi virus | Mengo virus | CVB3 H3 | CVB3 Nancy | Poliovirus |
| <i>Picornaviridae</i>                            |              |             |             |         |            |            |
| <i>Kobuvirus</i>                                 | Aichi virus  | 100.0       | 28.6        | 23.3    | 23.3       | 24.3       |
| <i>Cardiovirus</i>                               | Mengo virus  |             | 100.0       | 30.0    | 29.8       | 29.0       |
| <i>Enterovirus</i>                               | CVB3 H3      |             |             | 100.0   | 98.6       | 54.4       |
|                                                  | CVB3 Nancy   |             |             |         | 100.0      | 54.2       |
|                                                  | Poliovirus   |             |             |         |            | 100.0      |

423

424 **Table 2. List of reagents and bacterial strains used in this study.**

| <b>Name</b>                    | <b>Gram Status</b> | <b>Phylum</b>  | <b>Source</b>      |
|--------------------------------|--------------------|----------------|--------------------|
| Bovine Albumin Serum (BSA)     |                    |                | Fischer Scientific |
| Cellulose                      |                    |                | Sigma              |
| Lipopolysaccharide             |                    |                | Sigma (0127:B8)    |
| <i>Escherichia coli</i> 1470   | Gram negative      | Proteobacteria | Mouse cecum        |
| <i>Prevotella runimicola</i>   | Gram negative      | Bacteroidetes  | ATCC 19189         |
| <i>Bacillus badius</i>         | Gram positive      | Firmicutes     | Mouse cecum        |
| <i>Lactobacillus johnsonii</i> | Gram positive      | Firmicutes     | Mouse cecum        |

425

426

427

428

429

## 430 REFERENCES

431

432

433

434 1. Fields Virology. (2013) *6th Edition*, Lippincott Williams & Wilkins, Philadelphia, PA,  
435 USA

436 2. Sender, R., Fuchs, S., and Milo, R. (2016) Revised Estimates for the Number of  
437 Human and Bacteria Cells in the Body. *PLoS Biol* **14**, e1002533

438 3. Kuss, S. K., Best, G. T., Etheredge, C. A., Pruijssers, A. J., Frierson, J. M., Hooper, L. V.,  
439 Dermody, T. S., and Pfeiffer, J. K. (2011) Intestinal microbiota promote enteric virus  
440 replication and systemic pathogenesis. *Science* **334**, 249-252

441 4. Kane, M., Case, L. K., Kopaskie, K., Kozlova, A., MacDearmid, C., Chervonsky, A. V., and  
442 Golovkina, T. V. (2011) Successful transmission of a retrovirus depends on the  
443 commensal microbiota. *Science* **334**, 245-249

444 5. Baldridge, M. T., Nice, T. J., McCune, B. T., Yokoyama, C. C., Kambal, A., Wheadon, M.,  
445 Diamond, M. S., Ivanova, Y., Artyomov, M., and Virgin, H. W. (2015) Commensal  
446 microbes and interferon-lambda determine persistence of enteric murine norovirus  
447 infection. *Science* **347**, 266-269

448 6. Jones, M. K., Watanabe, M., Zhu, S., Graves, C. L., Keyes, L. R., Grau, K. R., Gonzalez-  
449 Hernandez, M. B., Iovine, N. M., Wobus, C. E., Vinje, J., Tibbetts, S. A., Wallet, S. M., and  
450 Karst, S. M. (2014) Enteric bacteria promote human and mouse norovirus infection  
451 of B cells. *Science* **346**, 755-759

452 7. Robinson, C. M., Jesudhasan, P. R., and Pfeiffer, J. K. (2014) Bacterial  
453 lipopolysaccharide binding enhances virion stability and promotes environmental  
454 fitness of an enteric virus. *Cell Host Microbe* **15**, 36-46

455 8. Berger, A. K., Yi, H., Kearns, D. B., and Mainou, B. A. (2017) Bacteria and bacterial  
456 envelope components enhance mammalian reovirus thermostability. *PLoS Pathog*  
457 **13**, e1006768

458 9. Uchiyama, R., Chassaing, B., Zhang, B., and Gewirtz, A. T. (2014) Antibiotic treatment  
459 suppresses rotavirus infection and enhances specific humoral immunity. *J Infect Dis*  
460 **210**, 171-182

461 10. Pfeiffer, J. K., and Virgin, H. W. (2016) Viral immunity. Transkingdom control of viral  
462 infection and immunity in the mammalian intestine. *Science* **351**

463 11. Ichinohe, T., Pang, I. K., Kumamoto, Y., Peaper, D. R., Ho, J. H., Murray, T. S., and  
464 Iwasaki, A. (2011) Microbiota regulates immune defense against respiratory tract  
465 influenza A virus infection. *Proc Natl Acad Sci U S A* **108**, 5354-5359

466 12. Bandoro, C., and Runstadler, J. A. (2017) Bacterial Lipopolysaccharide Destabilizes  
467 Influenza Viruses. *mSphere* **2**

- 468 13. Nguyen Y, J. P., Aguilera ER, Pfeiffer JK. (2018 submitted) Characterization of a  
469 thermal stable poliovirus mutant reveals distinct mechanisms of virion stabilization.
- 470 14. Erickson, A. K., Jesudhasan, P. R., Mayer, M. J., Narbad, A., Winter, S. E., and Pfeiffer, J.  
471 K. (2018) Bacteria Facilitate Enteric Virus Co-infection of Mammalian Cells and  
472 Promote Genetic Recombination. *Cell Host Microbe* **23**, 77-88 e75
- 473 15. Plevka, P., Perera, R., Yap, M. L., Cardosa, J., Kuhn, R. J., and Rossmann, M. G. (2013)  
474 Structure of human enterovirus 71 in complex with a capsid-binding inhibitor. *Proc*  
475 *Natl Acad Sci U S A* **110**, 5463-5467
- 476 16. Walter, T. S., Ren, J., Tuthill, T. J., Rowlands, D. J., Stuart, D. I., and Fry, E. E. (2012) A  
477 plate-based high-throughput assay for virus stability and vaccine formulation. *J Virol*  
478 *Methods* **185**, 166-170
- 479 17. Alvarez, M. E., and O'Brien, R. T. (1982) Effects of chlorine concentration on the  
480 structure of poliovirus. *Appl Environ Microbiol* **43**, 237-239
- 481 18. O'Brien, R. T., and Newman, J. (1979) Structural and compositional changes  
482 associated with chlorine inactivation of polioviruses. *Appl Environ Microbiol* **38**,  
483 1034-1039
- 484 19. Sharp, D. G., Floyd, R., and Johnson, J. D. (1975) Nature of the surviving plaque-  
485 forming unit of reovirus in water containing bromine. *Appl Microbiol* **29**, 94-101
- 486 20. Goda, H., Ikeda, K., Nishide, M., Nagao, T., and Koyama, A. H. (2018) Characterization  
487 of Virucidal Activities of Chlorous Acid. *Jpn J Infect Dis*
- 488 21. Wigginton, K. R., Pecson, B. M., Sigstam, T., Bosshard, F., and Kohn, T. (2012) Virus  
489 inactivation mechanisms: impact of disinfectants on virus function and structural  
490 integrity. *Environ Sci Technol* **46**, 12069-12078
- 491 22. Sabin, C., Fuzik, T., Skubnik, K., Palkova, L., Lindberg, A. M., and Plevka, P. (2016)  
492 Structure of Aichi virus 1 and its empty particle: clues towards kobuvirus genome  
493 release mechanism. *J Virol*
- 494 23. Zhu, L., Wang, X., Ren, J., Kotecha, A., Walter, T. S., Yuan, S., Yamashita, T., Tuthill, T. J.,  
495 Fry, E. E., Rao, Z., and Stuart, D. I. (2016) Structure of human Aichi virus and  
496 implications for receptor binding. *Nat Microbiol* **1**, 16150
- 497 24. Li, D., Breiman, A., le Pendu, J., and Uyttendaele, M. (2015) Binding to histo-blood  
498 group antigen-expressing bacteria protects human norovirus from acute heat stress.  
499 *Front Microbiol* **6**, 659
- 500 25. Miura, T., Sano, D., Suenaga, A., Yoshimura, T., Fuzawa, M., Nakagomi, T., Nakagomi,  
501 O., and Okabe, S. (2013) Histo-blood group antigen-like substances of human enteric  
502 bacteria as specific adsorbents for human noroviruses. *J Virol* **87**, 9441-9451
- 503 26. Pfeiffer, J. K., and Kirkegaard, K. (2003) A single mutation in poliovirus RNA-  
504 dependent RNA polymerase confers resistance to mutagenic nucleotide analogs via  
505 increased fidelity. *Proc Natl Acad Sci U S A* **100**, 7289-7294
- 506 27. Rueckert, R. R., and Pallansch, M. A. (1981) Preparation and characterization of  
507 encephalomyocarditis (EMC) virus. *Methods Enzymol* **78**, 315-325
- 508 28. Wang, Y., and Pfeiffer, J. K. (2016) Emergence of a Large-Plaque Variant in Mice  
509 Infected with Coxsackievirus B3. *MBio* **7**, e00119
- 510 29. Racaniello, V. R., and Baltimore, D. (1981) Molecular cloning of poliovirus cDNA and  
511 determination of the complete nucleotide sequence of the viral genome. *Proc Natl*  
512 *Acad Sci U S A* **78**, 4887-4891

- 513 30. Sasaki, J., Kusuhara, Y., Maeno, Y., Kobayashi, N., Yamashita, T., Sakae, K., Takeda, N.,  
514 and Taniguchi, K. (2001) Construction of an infectious cDNA clone of Aichi virus (a  
515 new member of the family Picornaviridae) and mutational analysis of a stem-loop  
516 structure at the 5' end of the genome. *J Virol* **75**, 8021-8030
- 517 31. Ida-Hosonuma, M., Iwasaki, T., Yoshikawa, T., Nagata, N., Sato, Y., Sata, T., Yoneyama,  
518 M., Fujita, T., Taya, C., Yonekawa, H., and Koike, S. (2005) The alpha/beta interferon  
519 response controls tissue tropism and pathogenicity of poliovirus. *J Virol* **79**, 4460-  
520 4469
- 521 32. Kumar, S., Stecher, G., and Tamura, K. (2016) MEGA7: Molecular Evolutionary  
522 Genetics Analysis Version 7.0 for Bigger Datasets. *Mol Biol Evol* **33**, 1870-1874
- 523 33. Tamura, K., Nei, M., and Kumar, S. (2004) Prospects for inferring very large  
524 phylogenies by using the neighbor-joining method. *Proc Natl Acad Sci U S A* **101**,  
525 11030-11035  
526

## Figure 1

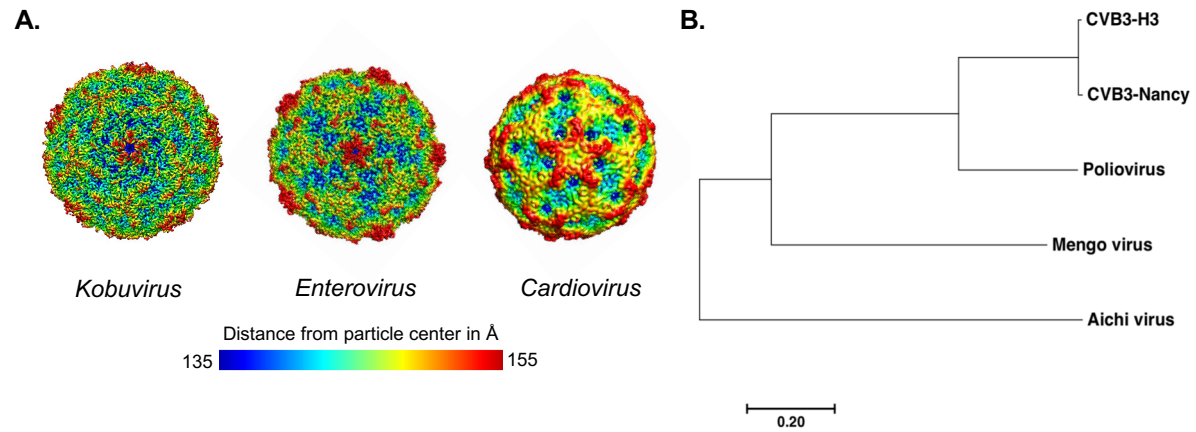



**Figure 2**

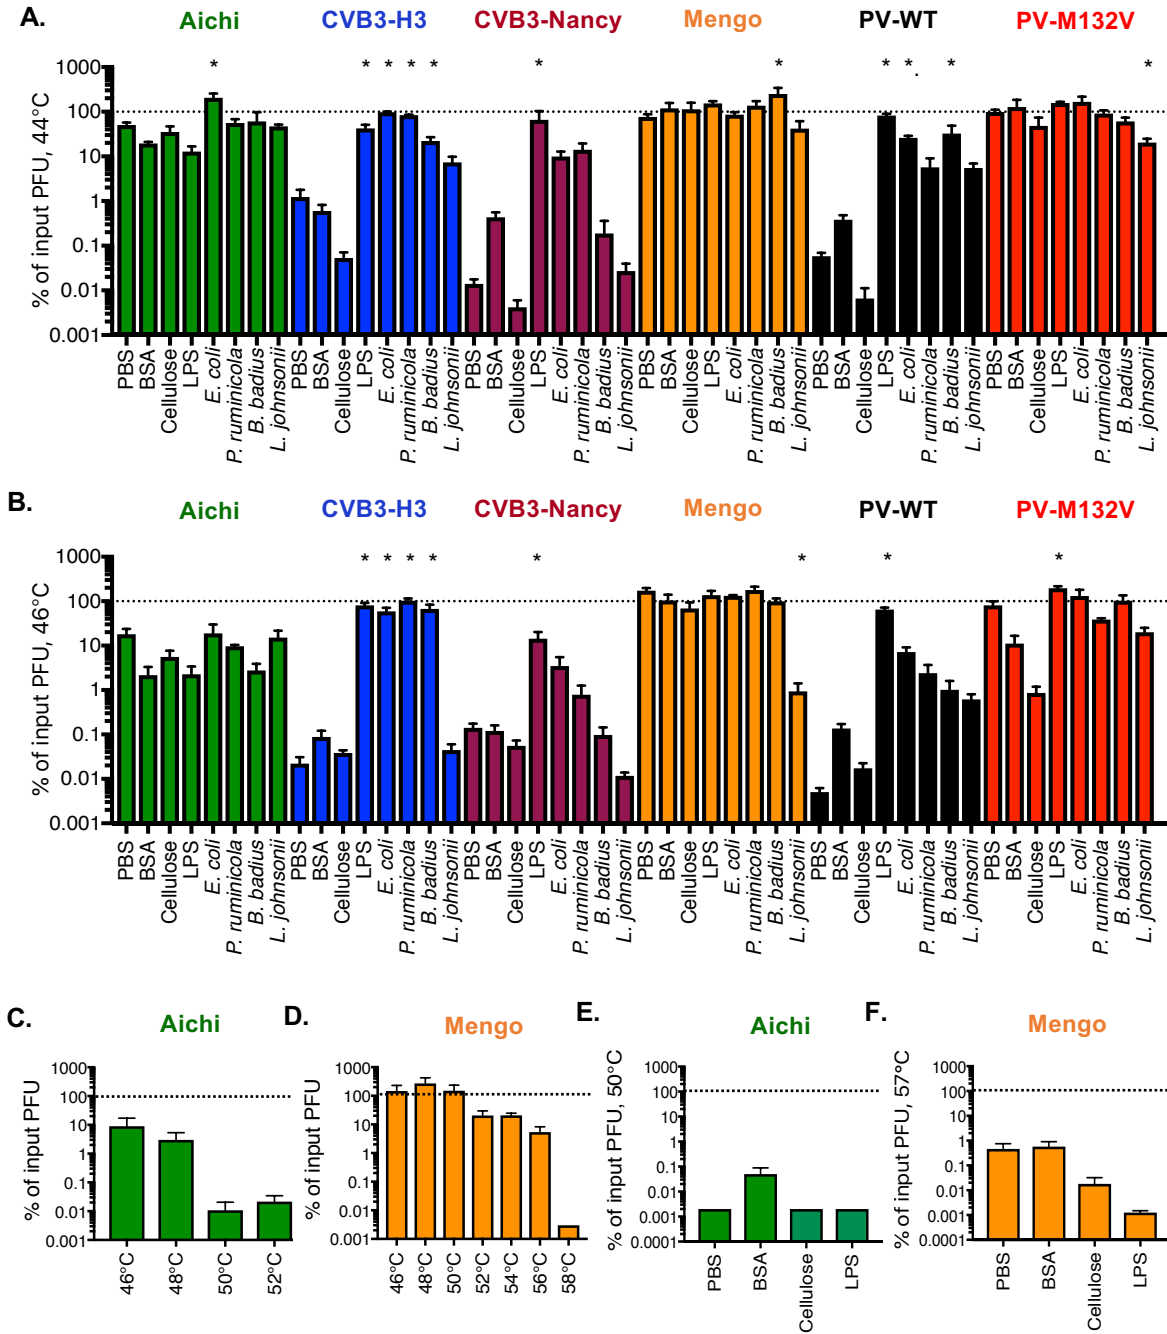

**Figure 3**

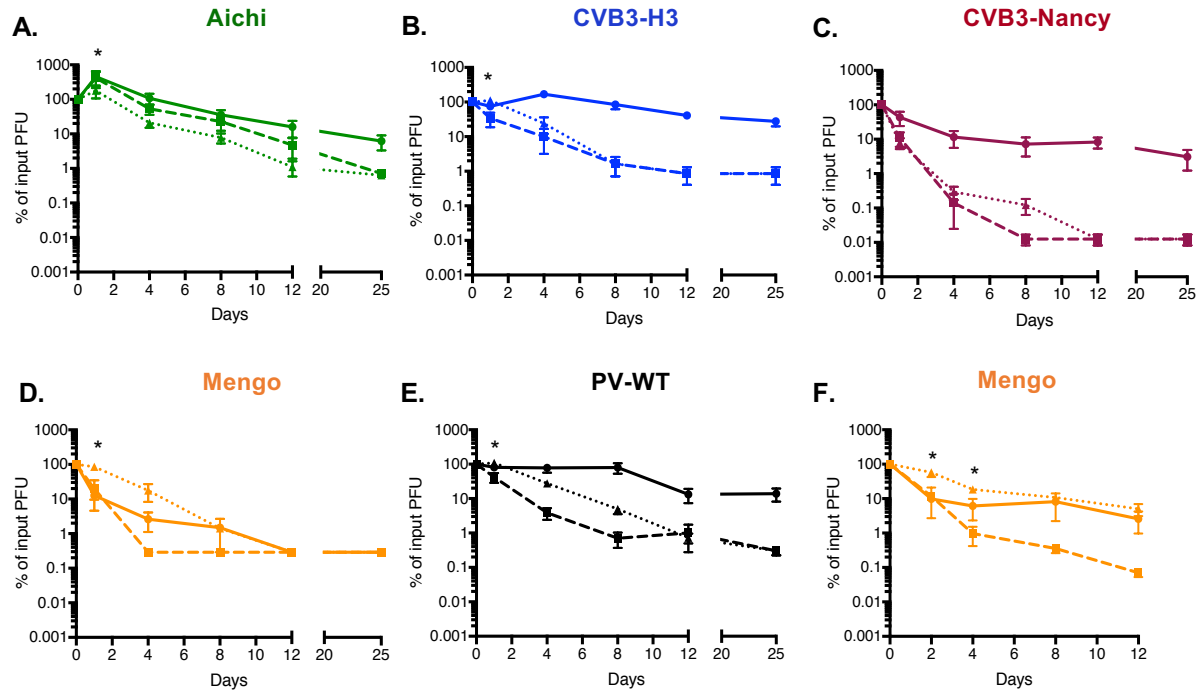

**Figure 4**

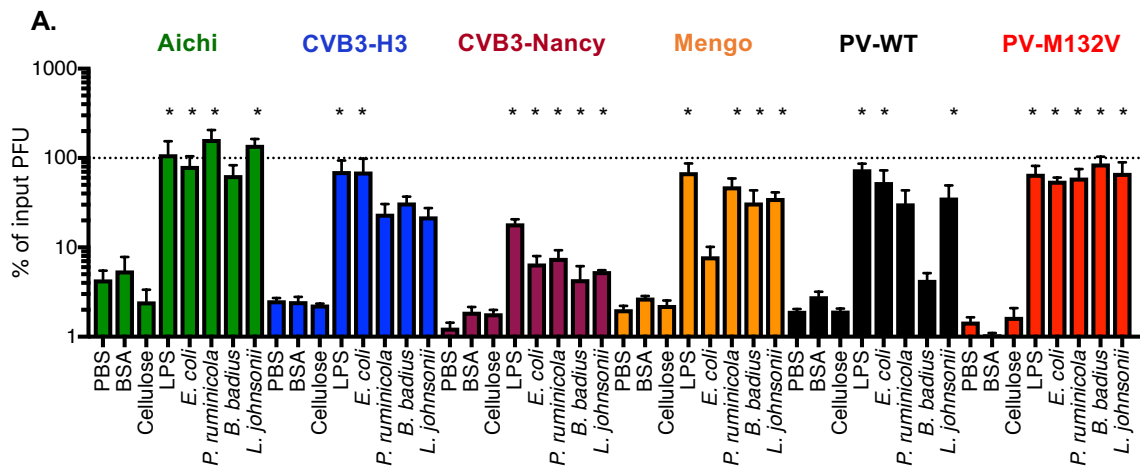

Figure 5

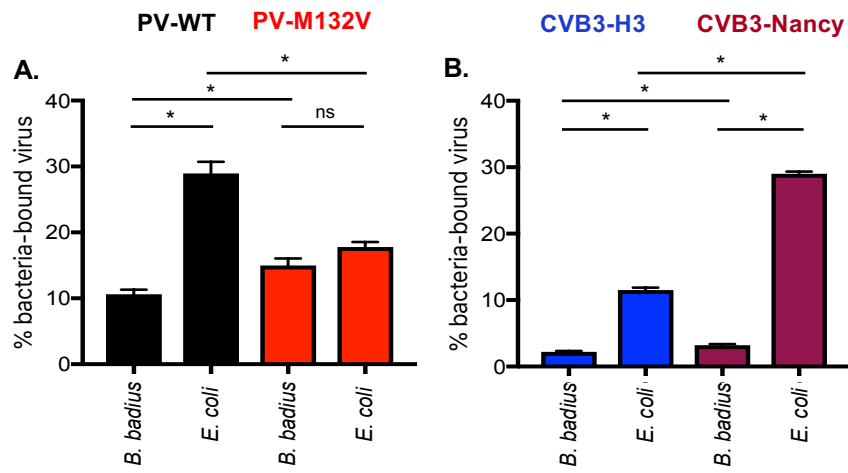

Source: http://biorxiv.org/content/10.1101/410167v1.full.pdf
